# Supplementary material for: Lycopene regulates the mitochondrial unfolded protein response to prevent DEHP-induced cardiac mitochondrial damage in mice
Source: Royal Society of Chemistry journal article supplement (doi:10.1039/d1fo03054j), 2022-01-01

## Supplementary information

of the full unprocessed and uncropped images of Western Blots

### 1. HSF1

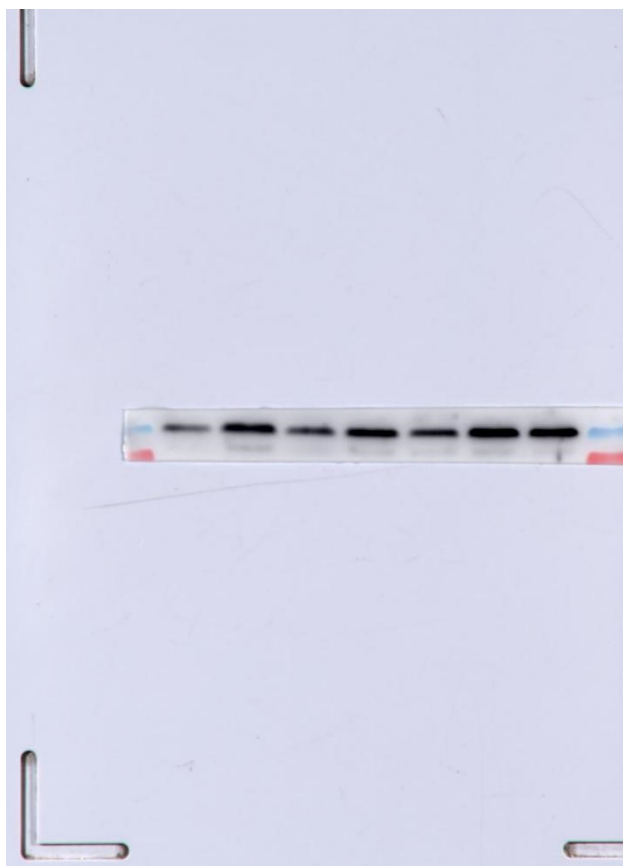

## 2. Clpp

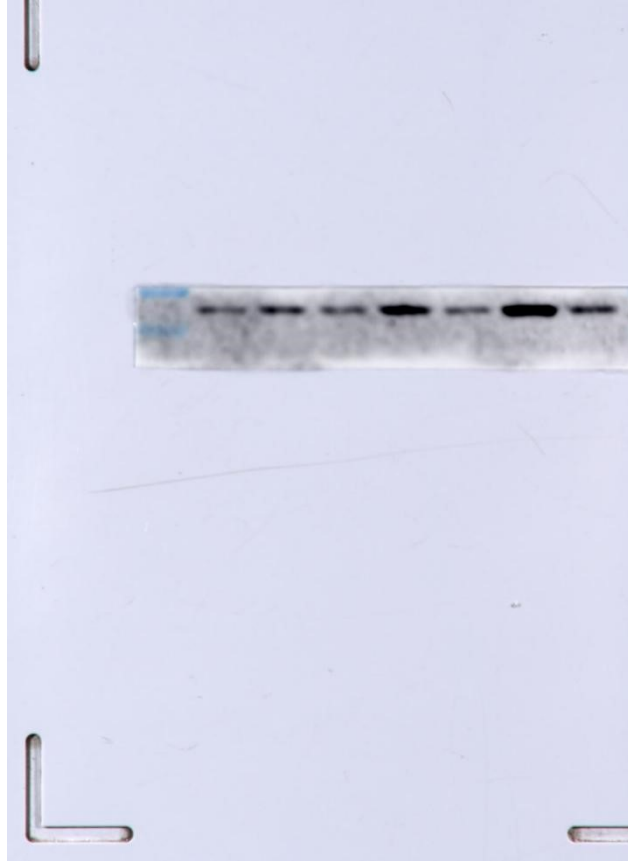

### 3. HSP60

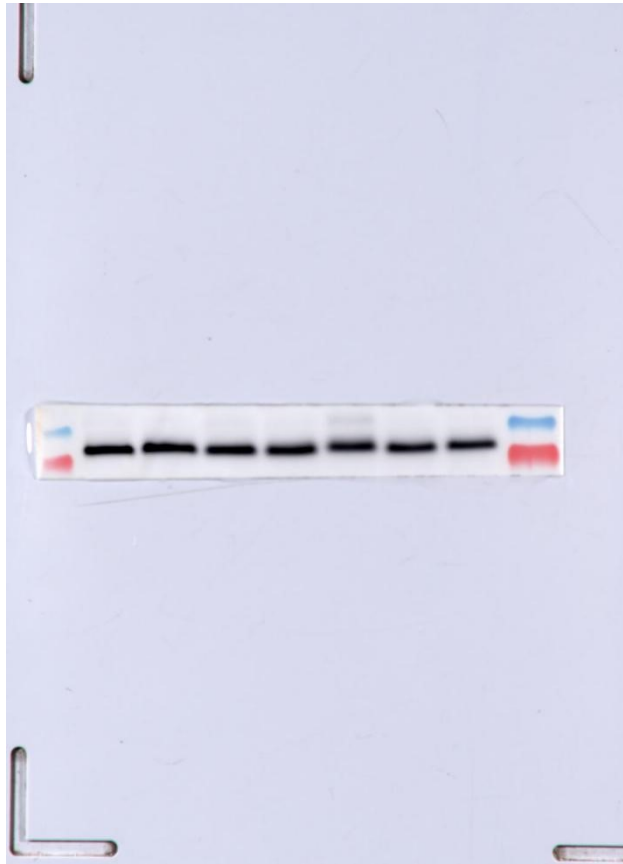

#### 4. Lonp

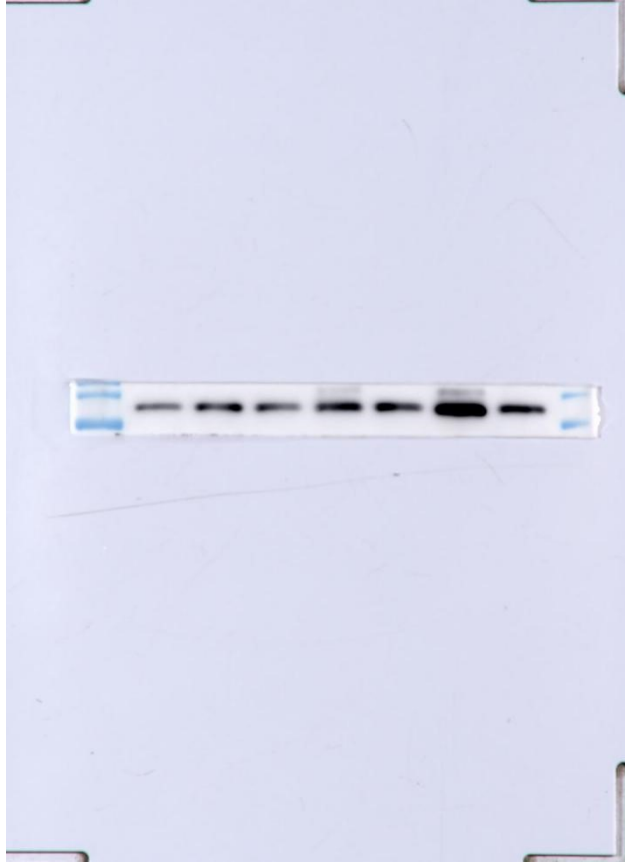

## 5. Nrf2

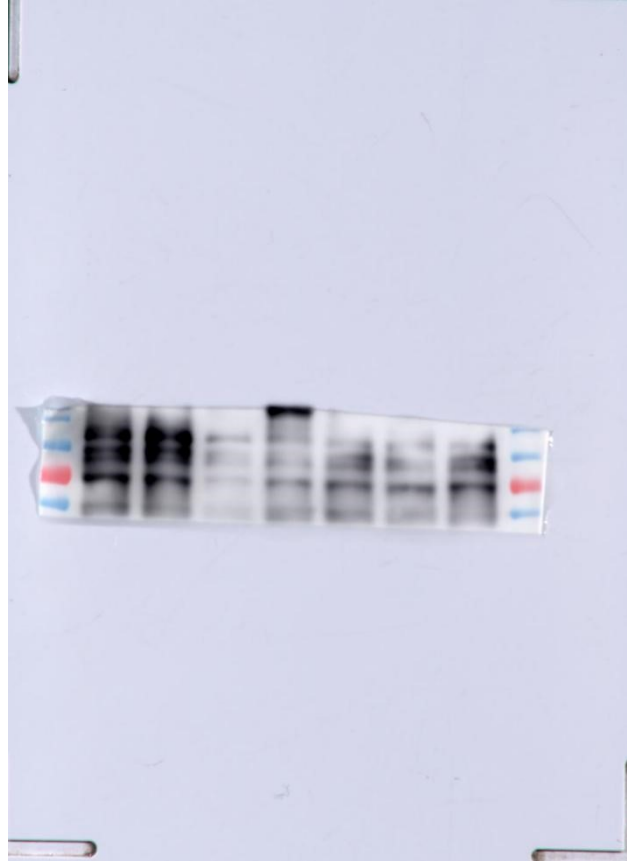

## 6. Sod-2

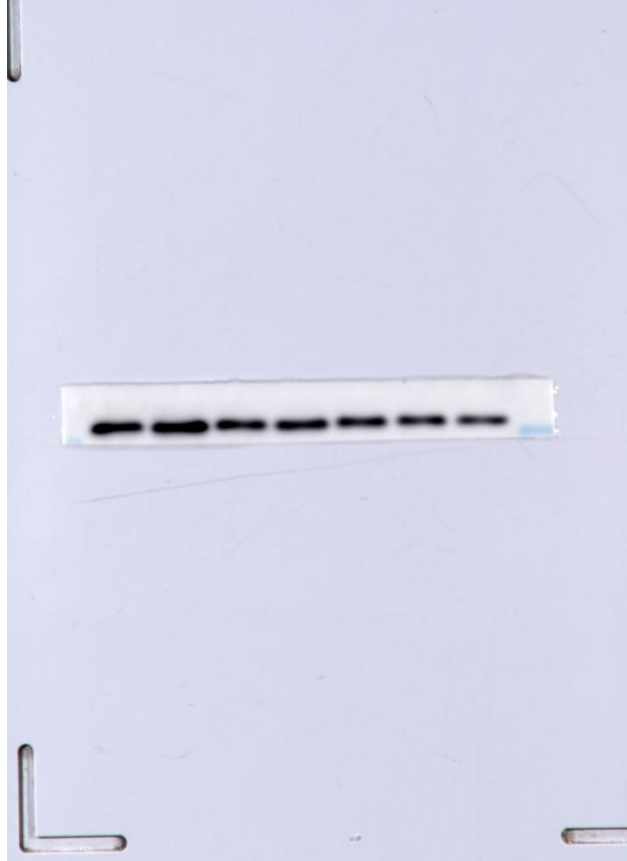

## 7. GPX4

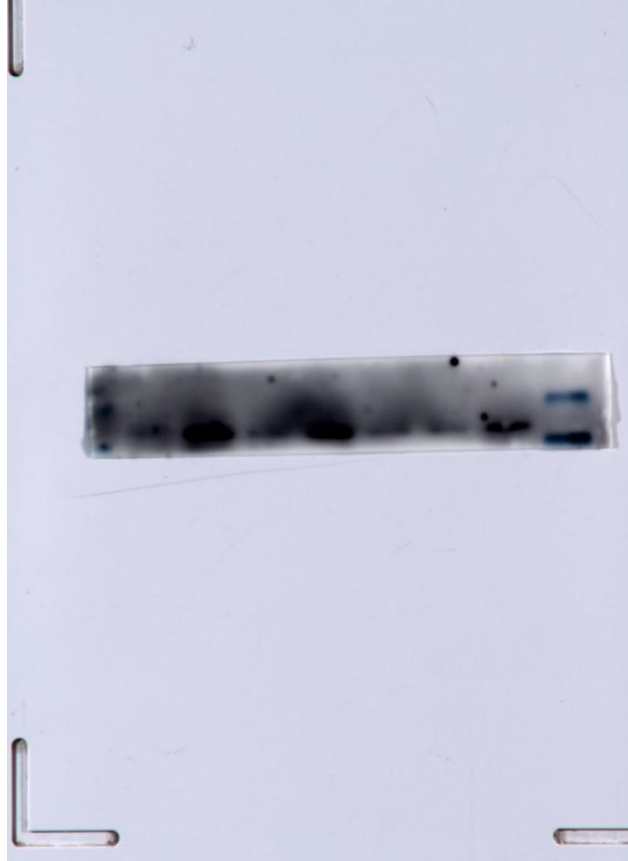

## 8. HSP90

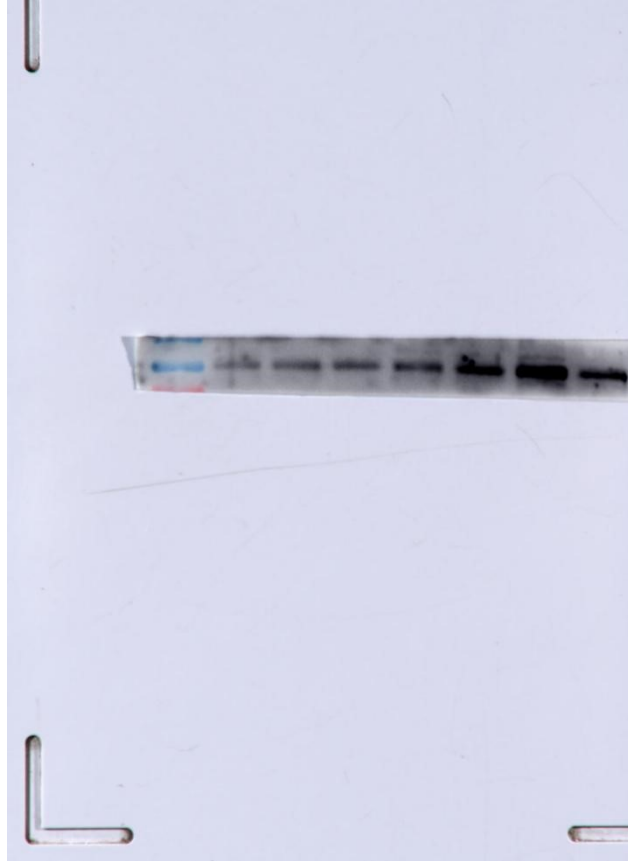



## 9. NQO1

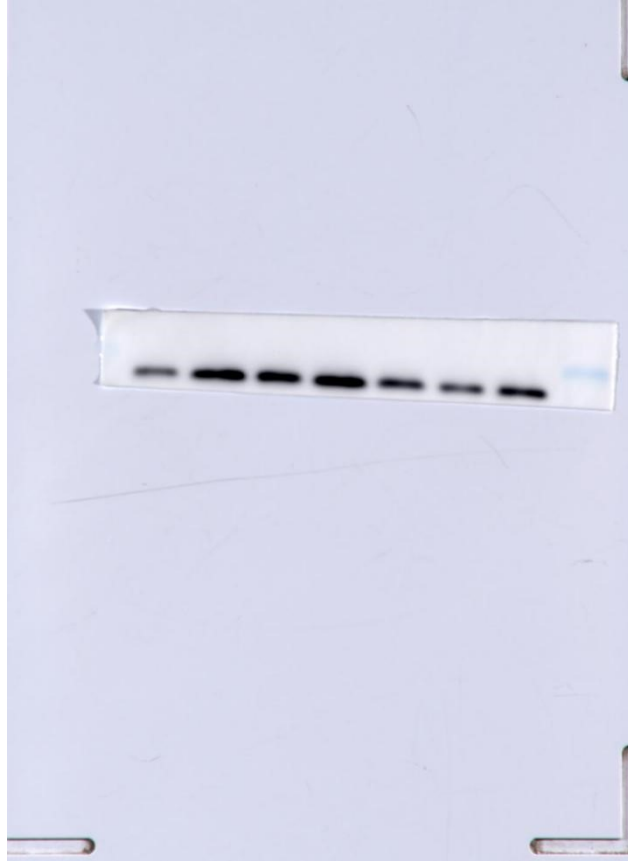

## 10. GAPDH

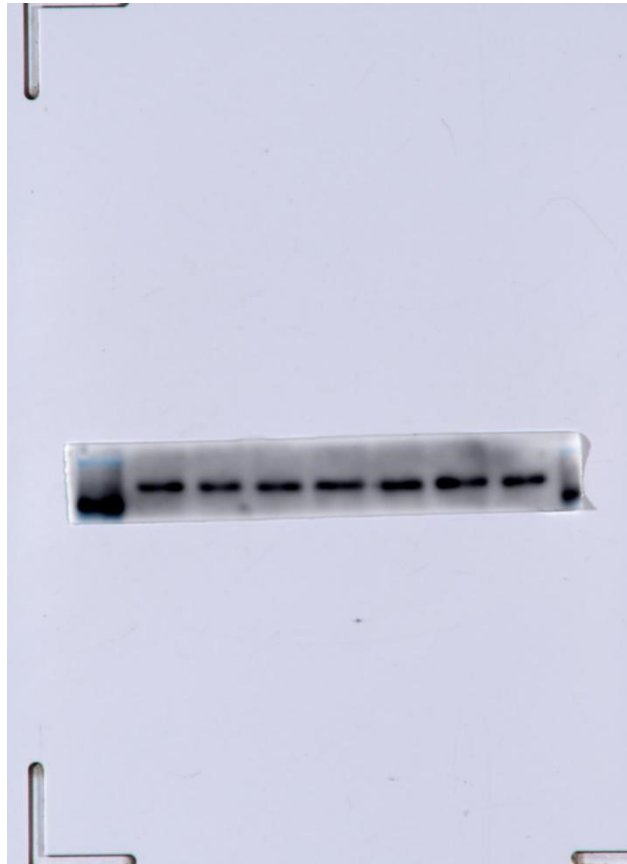

Supplement: d1fo03054j1.pdf [file d1fo03054j1.pdf]
