# Supplementary material for: Lycopene regulates the mitochondrial unfolded protein response to prevent DEHP-induced cardiac mitochondrial damage in mice
Source: Royal Society of Chemistry journal article supplement (doi:10.1039/d1fo03054j), 2022-01-01
Supplement: d1fo03054j2.pdf [file d1fo03054j2.pdf]

## ***Supplemental Materials***

**Figure S1. MMP.**

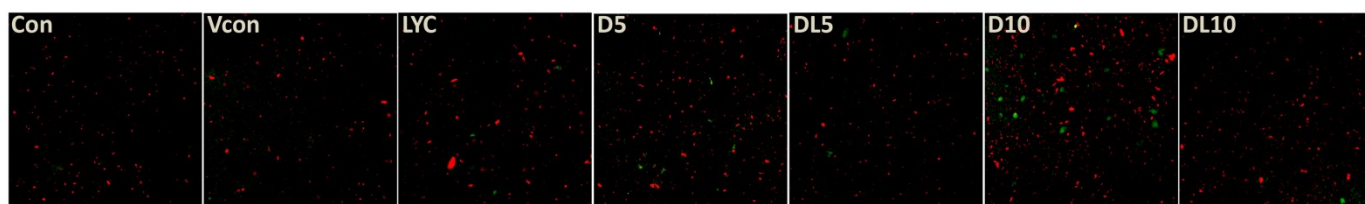

**Table S1. Animal groups.**

| <b>Groups</b> | <b>Number</b> | <b>Treatment</b> | <b>Concentration</b>                     |
|---------------|---------------|------------------|------------------------------------------|
| Con           | 20            | Pure water       |                                          |
| Vcon          | 20            | Corn oil         |                                          |
| LYC           | 20            | LYC              | 5 mg/kg/day                              |
| D5            | 20            | DEHP             | 500 mg/kg/day                            |
| DL5           | 20            | DEHP + LYC       | DEHP: 500 mg/kg/day<br>LYC: 5 mg/kg/day  |
| D10           | 20            | DEHP             | 1000 mg/kg/day                           |
| DL10          | 20            | DEHP + LYC       | DEHP: 1000 mg/kg/day<br>LYC: 5 mg/kg/day |

**Table S2. Sequences of oligonucleotide primers for QRT-PCR.**

| Gene Names | Sequence (5' → 3')                                   | NCBI<br>Sequence | Reference | Amplicon<br>(bp) | size |
|------------|------------------------------------------------------|------------------|-----------|------------------|------|
| GAPDH1     | AAGGTCGGTGTGAACGGATT<br>CAACAATCTCCACTTTGCCACT       | NM_001289726.1   |           | 82               |      |
| GAPDH2     | GCGACTTCAACAGCAACTCC<br>ACCCTGTTGCTGTAGCCGTA         | NM_008084.3      |           | 121              |      |
| HSF1       | ATGACACCGAGTTCCAGCATC<br>CACGCTGGTCACTTTCCTCT        | NM_001331152.1   |           | 83               |      |
| HSP10      | TGCTGCCGAAACTGTAACCA<br>CCACAGCCACGACCGTTG           | NM_008303.4      |           | 86               |      |
| HSP25      | CAGTCAGCGGAGATCACCAT<br>TGTTCACTTCCCAGCTTC           | NM_013560.2      |           | 80               |      |
| HSP32      | AGGTACACATCCAAGCCGAGA<br>TACAAGGAAGCCATCACCAG        | NM_013560.2      |           | 80               |      |
| HSP47      | GCCCCAAGCTGTTCTATGCC<br>TCTCGCATCTTGTCTCCCT          | NM_009825.2      |           | 115              |      |
| HSP60      | CCACTGTTCTGGCAGAT<br>ATCCACAGCCAACATCACACC           | NM_010477.4      |           | 101              |      |
| HSP70      | CCCGCCTACTTCAACGACT<br>TCGTTGATGATCCGCAGCAC          | NM_010479.2      |           | 86               |      |
| HSP90      | TGACATCATCCCCAACCCCTC<br>TTCGTGCCAGACTTAGCAA         | NM_008302.3      |           | 114              |      |
| HSP110     | CAGAAGAAAGCAAAACCCCAG<br>GCAGCTCAACATTTACCACCT       | NM_013559.2      |           | 105              |      |
| Nrf2       | TCACACGAGATGAGCTTAGGGCAA<br>TACAGTTCTGGGCGGCGACTTTAT | NM_010902.4      |           | 183              |      |
| NQO1       | GGTGAGCTGAAGGACTCGAA<br>ACCACTGCAATGGGAAGTCAA        | NM_008706.5      |           | 148              |      |
| HO-1       | ACATCCAAGCCGAGAATGCTG<br>CCAGTGAGGCCCATACCAGA        | NM_010442.2      |           | 230              |      |
| TXN-1      | AAGCCCTTCTTCCATTCCCT<br>ACATCCTGGCAGTCATCCAC         | NM_011660.3      |           | 80               |      |
| GCLM       | GCCACCAGATTTGACTGCCTTT<br>CAGGGATGCTTCTTGAAGAGCTT    | NM_008129.4      |           | 119              |      |

|        |                                                 |             |     |
|--------|-------------------------------------------------|-------------|-----|
| GCLC   | ATCTACCACGCAGTCAAG<br>GTCTCAAGAACATCGCCT        | NM_010295.2 | 134 |
| GSS    | CAAAGCAGGCCATAGACAGGG<br>AAAAGCGTGAATGGGGCATAAC | NM_008180.2 | 103 |
| GSTA4  | AGTGCAGCGTGCTTTAAGGT<br>GGGCAGAGTGGTTTTGTTGT    | NM_010357.3 | 135 |
| CAT    | ATGGCTATGGATCACACACCT<br>CCTTCCTGCCTCTCCAAC     | NM_009804.2 | 119 |
| SOD-1  | GCCCGGCGGATGAAG<br>CCTTTCCAGCAGTCACATTGC        | NM_011434.2 | 57  |
| SOD-2  | GCCACACATTAACGCGCAGA<br>GAGCCTCGTGGTACTTCTCC    | NM_013671.3 | 101 |
| ATF5   | CTTGCCACCTTTGACCTCC<br>GGTTGACAAGCCTGAATCCC     | NM_030693.2 | 106 |
| Clpp   | TCATTGCCCAGCTGTTGT<br>CAGGCCCGCAGTTACCAC        | NM_017393.2 | 95  |
| Lonp   | GGTCGTATCATCAATGGCTT<br>TTCCCCAGCTTGTC AACCTC   | NM_025827.3 | 80  |
| YME1L1 | TCCTCTTTGTTTTGCTCCTGT<br>TACCGCAGAATCAAGTCCTGT  | NM_013771.5 | 98  |
| Sirt7  | CGCCATCTCAGAGCTCCA<br>CGCTCAGTCACATCAAACACT     | NM_153056.3 | 96  |
| ATF5   | CTTGCCACCTTTGACCTCC<br>GGTTGACAAGCCTGAATCCC     | NM_030693.2 | 106 |

---

## **Supplementary 1. Details of Materials and Methods**

### **Supplementary 1.1 Western Blotting**

The total protein were extracted from the heart tissues and quantified by commercially available kits (Beyotime institute of biotechnology, P.R. China). Protein extracts from the samples were separated by SDS-PAGE and transferred to a nitrocellulose membrane (Biosharp, P.R. China). Non-specific binding sites were then incubated with PBST which contained 5% fat-free milk. Furthermore, GAPDH (1:1500, Beijing Biosynthesis Biotechnology Co., Ltd) was used as a protein loading control respectively (Zhang et al., 2017a,b). Afterwards, the incubated membranes further incubated in the Secondary antibody against rabbit IgG (1:3000; Santa Cruz, CA) at 37 °C for around 1.5 h. Then the membranes were washed with PBST three times after 1.5 h. The protein bands were quantified by Amersham Imager 600 (GE, Switzerland). Densitometry analysis of specific bands was performed by Image J (National Institute of Health, USA).

### **Supplementary 1.2 The measurement of the number of myocardial fibers disordered and measurement of mitochondria volume.**

#### **1.2.1 The measurement of the number of myocardial fibers disordered.**

Under the (400X) microscope, randomly select five visual fields in the middle ring muscle layer, analyze the disorder of myocardial fiber arrangement in the visual field, and count the number of observed disorder of myocardial fiber arrangement. And the data were analysed by GraphPad Prism 5.1 SPSS 19.0 software. Statistical significance was indicated by the value of  $P < 0.05$ .

#### **1.2.2 The measurement of mitochondria volume.**

Randomly select 5 electron microscope pictures, place the selected pictures in the grid, divide the grid into 81 grids, a total of 100 crossing points, and count how many crossing points fall on mitochondria. And the data were analysed by GraphPad Prism 5.1 SPSS 19.0 software. Statistical significance was indicated by the

value of  $P < 0.05$ .

### **Supplementary 1.3 MMP**

Mitochondria were isolated from liver tissue by using the commercial kit (Beyotime, Shanghai, China). Briefly, 100 mg heart tissue was obtained from the mice in all 7 groups after deep anaesthesia. The tissue was cut in 1ml PBS solution, and remove supernatant ( $600 \times g$  for 20 sec at  $4^{\circ} C$ ). Add 0.8ml trypsin digestive solution, ice bath for 20 minutes, and discard the ( $600 \times g$  for 20 sec at  $4^{\circ} C$ ). After that add the isolation reagent A(0.2 ml), then resuspend and discard the ( $600 \times g$  for 20 sec at  $4^{\circ} C$ ). Then the isolation reagent A (1 ml) was mixed with the tissue and both were made into homogenates, which were centrifuged ( $600 \times g$  for 5 min at  $4^{\circ} C$ ) to collect the supernatants. The supernatant was collected for a second centrifuge ( $11000 \times g$  for 10 min at  $4^{\circ} C$ ) to settle mitochondria. Finally, the mitochondria were resuspended and preserved in a preserving solution (supplied by the kit). All of the procedures were accomplished in iced bath. The mitochondrial protein concentrations were determined by a BCA Protein. JC-1 staining working solution was diluted with the prepared with JC-1 staining buffer (1X) 5 times. The 0.1 ml purified mitochondria extracted from liver tissues with a total protein content of 10-100 $\mu$ g was added to 0.9ml of the 5-fold diluted JC-1 staining working solution. The emission wavelength is 590nm, the excitation wavelength is 485nm, respectively.
